# Supplementary material for: Wall Teichoic Acids Facilitate the Release of Toxins from the Surface of Staphylococcus aureus
Source: PubMed Central journal article supplement (PMC9430763; doi:10.1128/spectrum.01011-22), 2022-07-07
Supplement: reviewer-comments.pdf [file reviewer-comments.pdf]

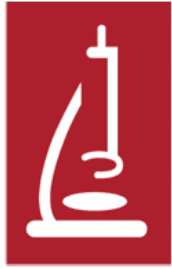

AMERICAN  
SOCIETY FOR  
MICROBIOLOGY

# Microbiology Spectrum

## Wall teichoic acids facilitate the release of toxins from the surface of *Staphylococcus aureus*.

Tarcisio Brignoli, Edward Douglas, Seána Duggan, Olayemi Fagunloye, Rajan Adhikari, Javad Aman, and Ruth Massey

*Corresponding Author(s): Ruth Massey, University of Bristol*

---

### Review Timeline:

Submission Date:

May 29, 2022

Accepted:

June 6, 2022

---

*Editor: Christopher LaRock*

*Reviewer(s): The reviewers have opted to remain anonymous.*

### Transaction Report:

(Note: With the exception of the correction of typographical or spelling errors that could be a source of ambiguity, letters and reports are not edited. The original formatting of letters and referee reports may not be reflected in this compilation.)

**DOI:** <https://doi.org/10.1128/spectrum.01011-22>

June 6, 2022

Prof. Ruth Catherine Massey  
University of Bristol  
School of Cellular and Molecular Medicine  
Biomedical Sciences Building  
University Walk  
Bristol BS8 1TD  
United Kingdom

Re: Spectrum01011-22 (Wall teichoic acids facilitate the release of toxins from the surface of *Staphylococcus aureus*.)

Dear Prof. Ruth Catherine Massey:

Your manuscript was transferred with recommendations from expert reviewers in the field. Your comprehensive responses and edits satisfy each of their comments and no additional review will be needed. Your manuscript has been accepted, and I am forwarding it to the ASM Journals Department for publication. You will be notified when your proofs are ready to be viewed.

The ASM Journals program strives for constant improvement in our submission and publication process. Please tell us how we can improve your experience by taking this quick [Author Survey](#).

As an open-access publication, Spectrum receives no financial support from paid subscriptions and depends on authors' prompt payment of publication fees as soon as their articles are accepted. You will be contacted separately about payment when the proofs are issued; please follow the instructions in that e-mail. Arrangements for payment must be made before your article is published. For a complete list of **Publication Fees**, including supplemental material costs, please visit our [website](#).

ASM policy requires that data be available to the public upon online posting of the article, so please verify all links to sequence records, if present, and make sure that each number retrieves the full record of the data. If a new accession number is not linked or a link is broken, provide production staff with the correct URL for the record. If the accession numbers for new data are not publicly accessible before the expected online posting of the article, publication of your article may be delayed; please contact the ASM production staff immediately with the expected release date.

Corresponding authors may [join or renew ASM membership](#) to obtain discounts on publication fees. Need to upgrade your membership level? Please contact Customer Service at [Service@asmusa.org](mailto:Service@asmusa.org).

Thank you for submitting your paper to Spectrum.

Sincerely,

Christopher LaRock  
Editor, Microbiology Spectrum

Journals Department  
American Society for Microbiology  
1752 N St., NW  
Washington, DC 20036  
E-mail: [spectrum@asmusa.org](mailto:spectrum@asmusa.org)

Supplemental Material: Accept
