# Supplementary material for: Wall Teichoic Acids Facilitate the Release of Toxins from the Surface of Staphylococcus aureus
Source: PubMed Central journal article supplement (PMC9430763; doi:10.1128/spectrum.01011-22), 2022-07-07
Supplement: spectrum.01011-22-s0001.pdf [file spectrum.01011-22-s0001.pdf]

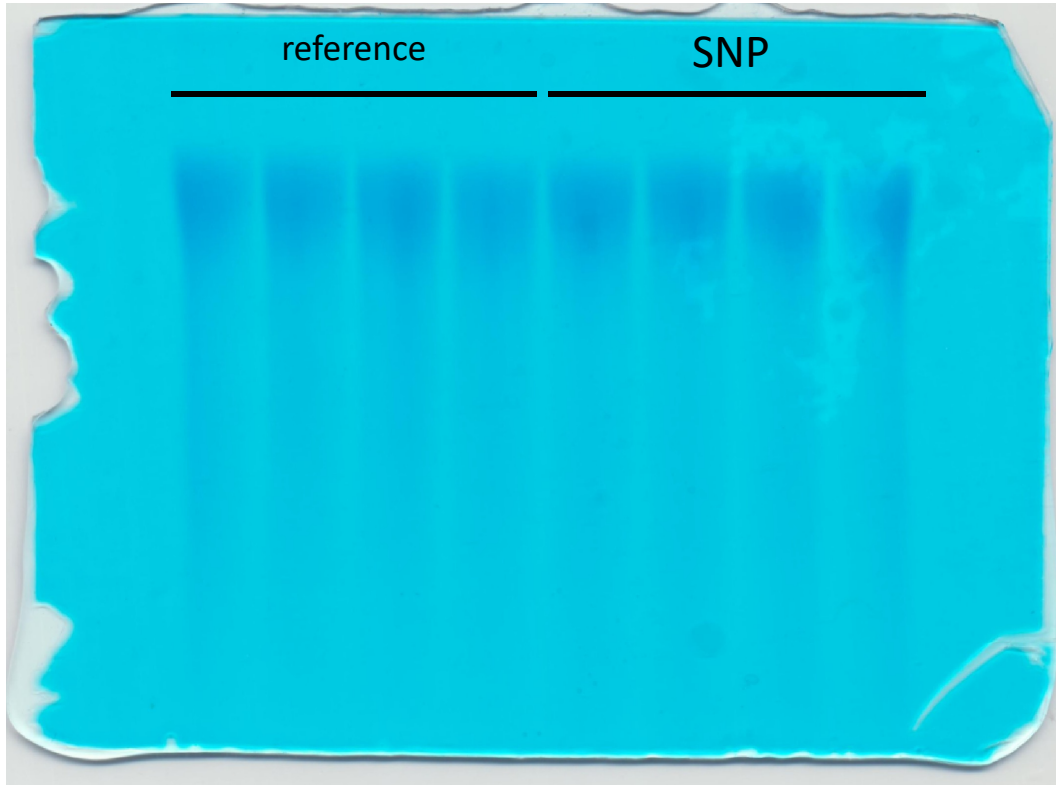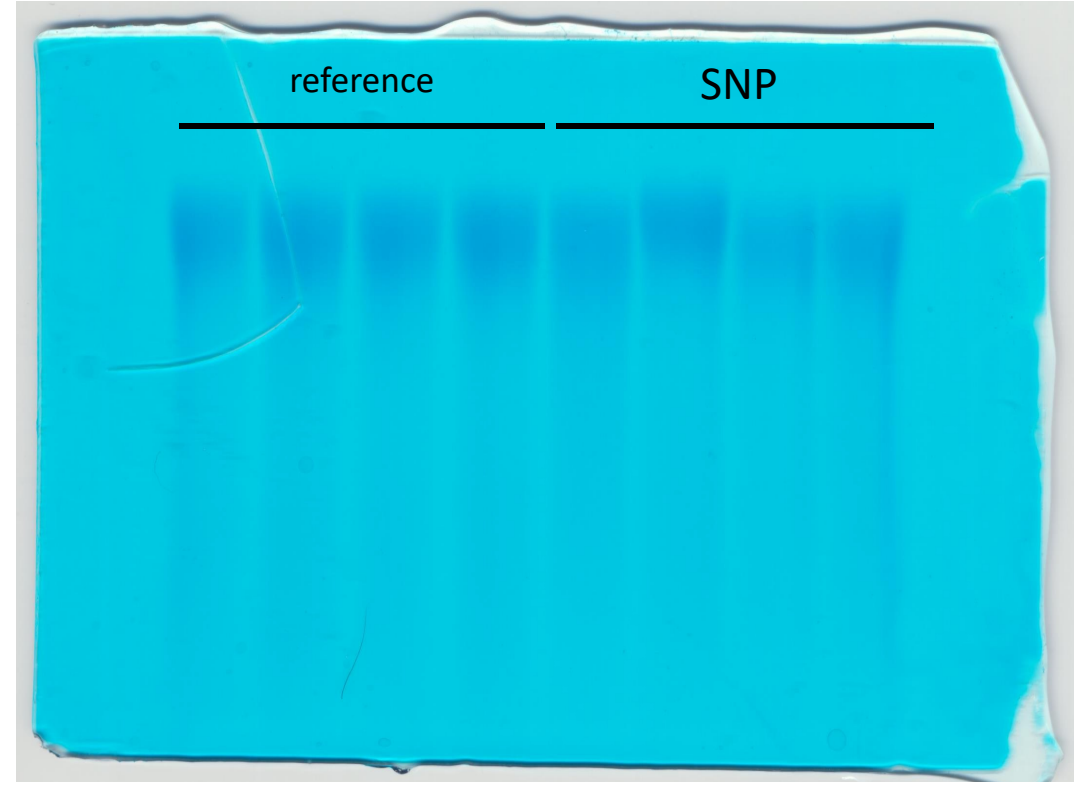

**Supp. Fig. 1: The presence of the intergenic SNP does not affect WTA length/polymerisation.** WTA was extracted from 16 clinical isolates, eight with the reference (wild type) *tar* intergenic sequence, and eight with the intergenic SNP. No difference in the length or polymerisation of the WTA was evident.

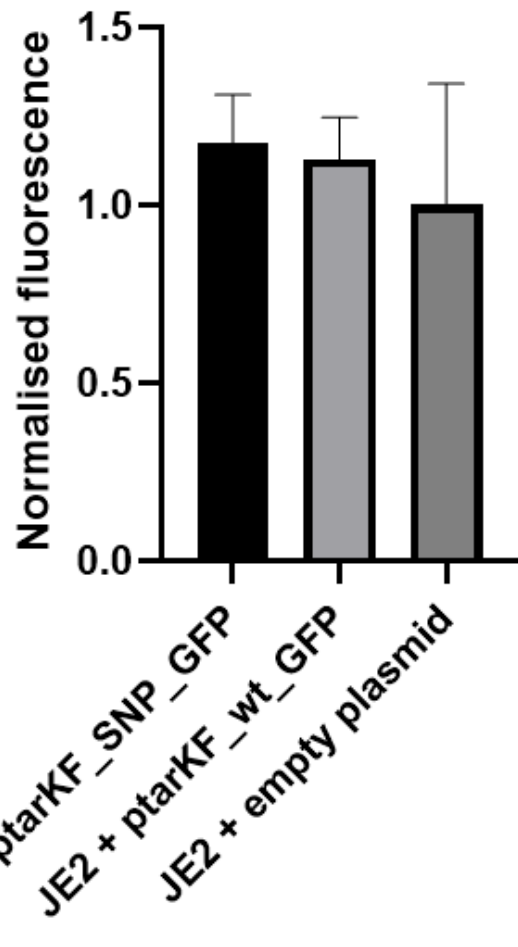

**Supp. Fig. 2: Transcription from the *tarF* promoter is undetectable by promoter GFP fusion.** The graph shows the fluorescence detected from overnight growths of JE2 transformed with pOS1 plasmid containing the GFP reporter fusion with the wild type (wt) intergenic region, pOS1 plasmid containing the GFP reporter fusion with the SNP intergenic region and empty pOS1 plasmid. Fluorescence values were normalised to the empty plasmid control.

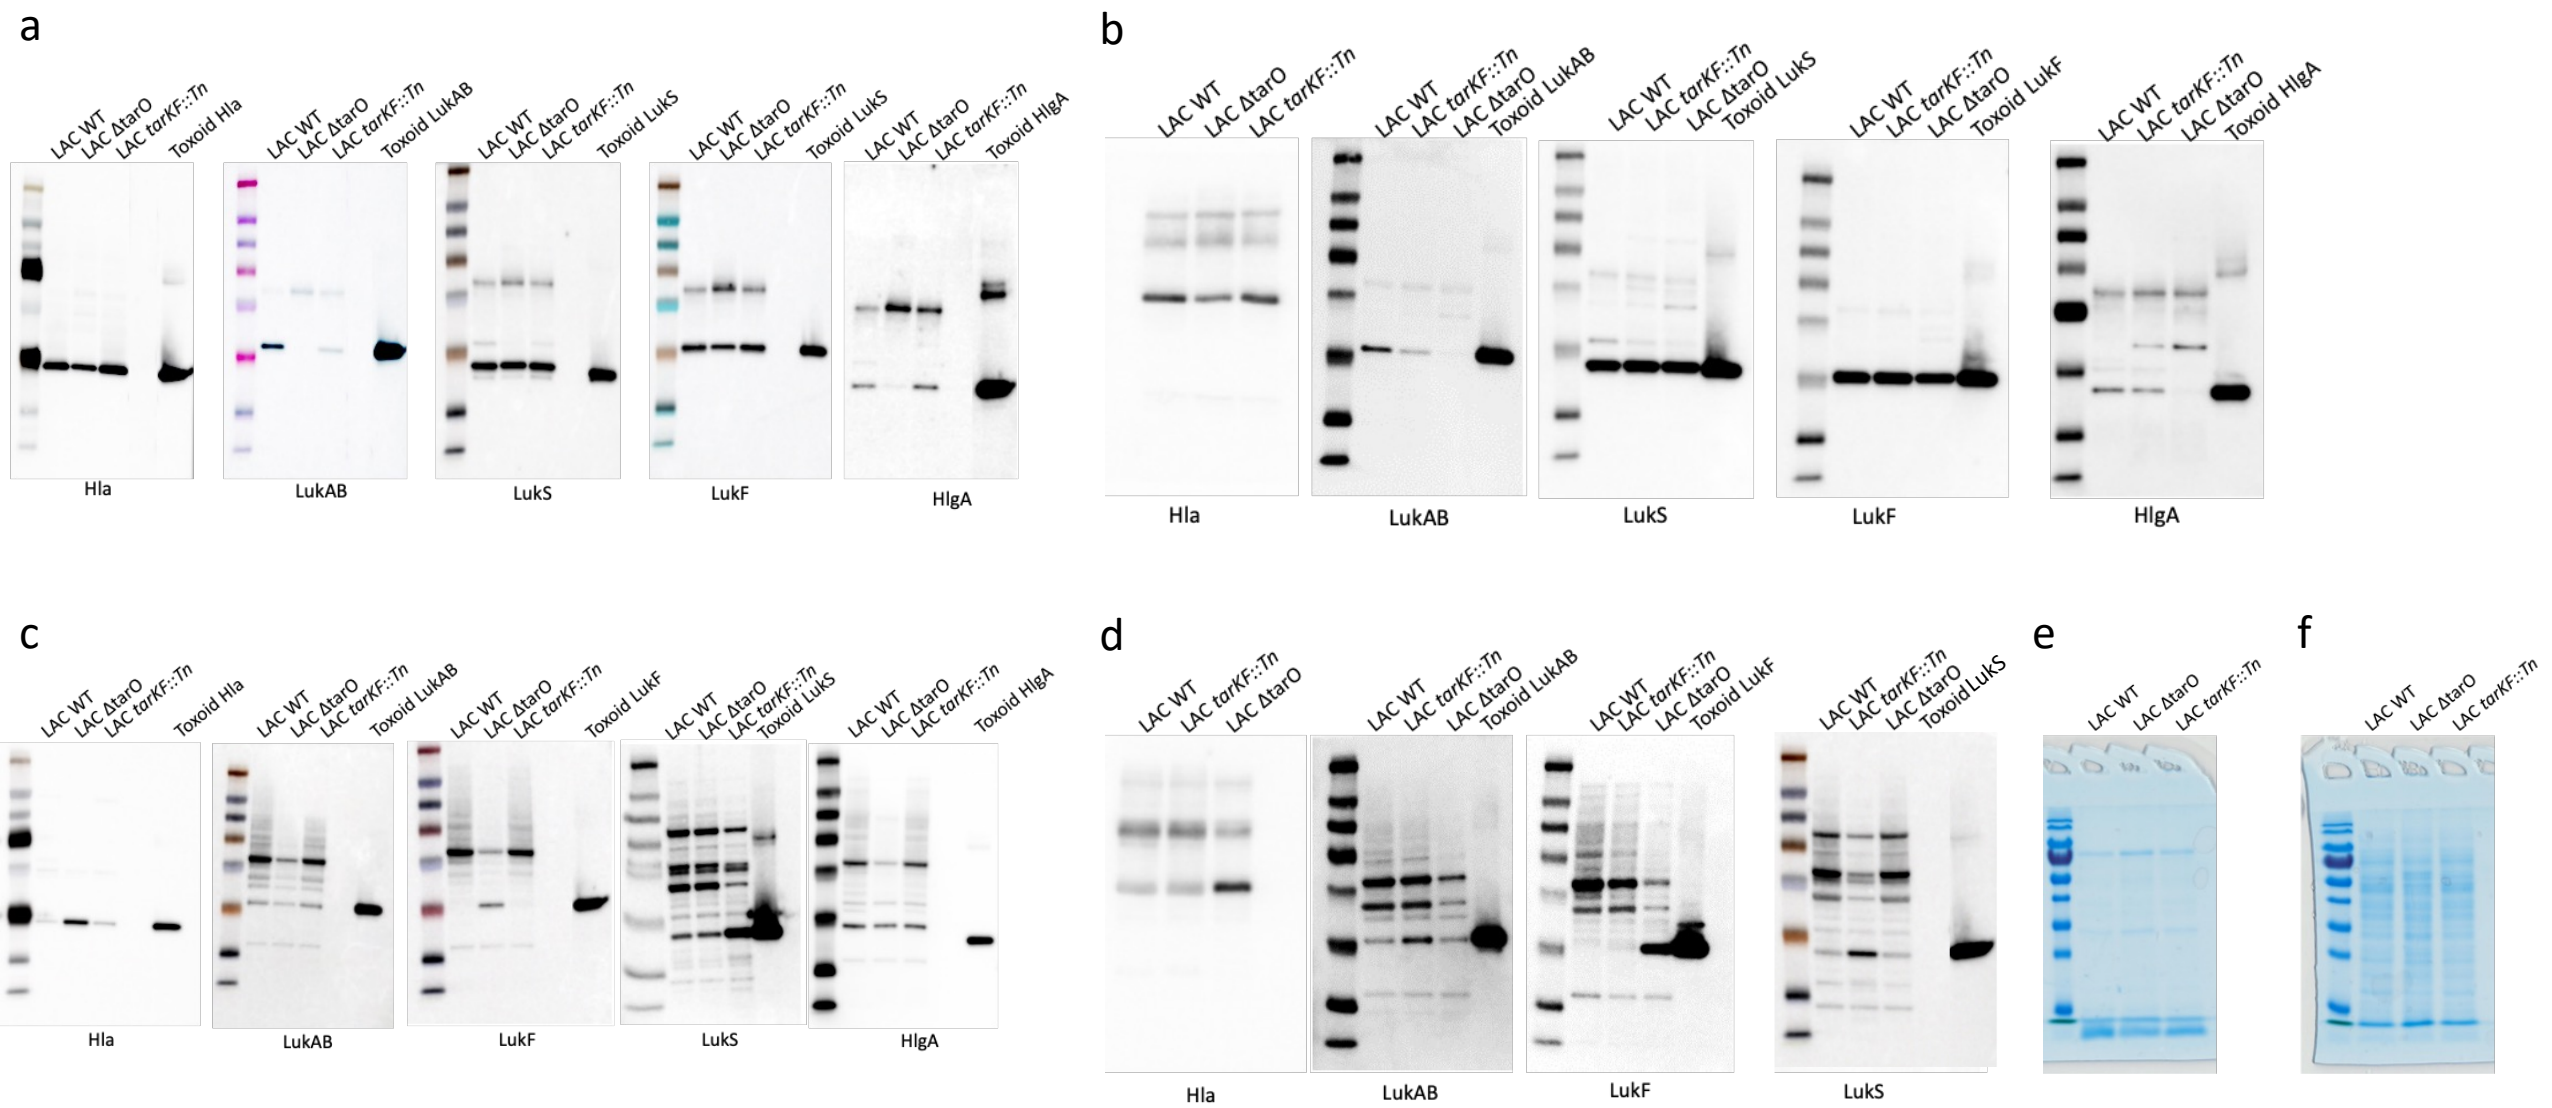

**Supp Fig. 3: Toxins abundance in whole cell lysates and supernatants replicates.** Western replicates (a) supernatant, replicate 1. (b) supernatant, replicate 2. (c) whole cell lysate, replicate 1. (d) whole cell lysate, replicate 2. Since HlgA was not detectable in the first replicate, the western was not repeated. Coomassie gels replicates (e) supernatants, replicate 2. (f) whole cell lysate, replicate 2.

| Accession | Description                            | Score | Coverage | Area                | # AAs | MW [kDa] |
|-----------|----------------------------------------|-------|----------|---------------------|-------|----------|
| Q2FWM8    | Delta-hemolysin                        | 26.65 | 96.15    | $3.782 \times 10^7$ | 26    | 3.0      |
| Q2FZA4    | Phenol soluble modulin beta 1          | 13.75 | 70.45    | $8.575 \times 10^6$ | 44    | 4.5      |
| P0C7Y1    | Phenol-soluble modulin alpha 1 peptide | 4.68  | 85.71    | $9.601 \times 10^7$ | 21    | 2.3      |
| P0C818    | Phenol-soluble modulin alpha 4 peptide | 4.32  | 85.00    | $1.680 \times 10^8$ | 20    | 2.2      |
| Q2FZA3    | Phenol soluble modulin beta 2          | 4.17  | 40.91    | $4.538 \times 10^5$ | 44    | 4.5      |

**Supp. Table 1. PSMs band identification.** The table shows the proteins identified in the 3kDa band on SDS page gel from JE2 supernatants. Coverage: percentage of the protein sequences covered by identified peptides. Areas: distribution of areas calculated by the Peptide and Protein Quantifier node over the sample groups. # Aas: the theoretical length of the protein sequence. MW [kDa]: theoretical molecular weight of the protein.

| Toxin          | isoelectric point |
|----------------|-------------------|
| LukG           | 8.42              |
| LukH           | 9.30              |
| Hla            | 7.94              |
| LukS           | 8.90              |
| LukF           | 8.96              |
| HlgA           | 9.53              |
| Hld            | 9.03              |
| Psm $\alpha$ 1 | 9.70              |
| Psm $\alpha$ 2 | 10.00             |
| Psm $\alpha$ 3 | 9.52              |
| Psm $\alpha$ 4 | 9.70              |
| Psm $\beta$ 1  | 4.78              |
| Psm $\beta$ 2  | 5.36              |

**Supp. Table 2. Isoelectric points of the toxins whose secretion is impaired in a WTA mutant.** The isoelectric points were calculated on the amino acid sequence, excluding the signal peptide, using the online tool Compute pI/Mw ([https://web.expasy.org/compute\\_pi/](https://web.expasy.org/compute_pi/)).

**Supp. Table 2. Clinical strains used in this study.** The strain names for 90 isolates of *S. aureus* of the ST239 lineage are listed. Whether they contain the *tarF* promoter SNP is indicated, as is their toxicity as measured by vesicle lysis.

| Strain ID | Tarf SNP? | Toxicity (fluor.units) | Strain ID | Tarf SNP? | Toxicity (fluor. units) | Strain ID | Tarf SNP? | Toxicity (fluor.units) |
|-----------|-----------|------------------------|-----------|-----------|-------------------------|-----------|-----------|------------------------|
| IU12      | SNP       | 86313                  | IU19      |           | 25421                   | DEU12     |           | 15424                  |
| IU9       | SNP       | 85826                  | DEU6      |           | 25366                   | DEU49     |           | 15328                  |
| IU4       | SNP       | 85146                  | DEU25     |           | 25121                   | HU19      |           | 15119                  |
| IU17      | SNP       | 85090                  | DEU8      |           | 23850                   | DEU5      |           | 14901                  |
| IU20      | SNP       | 83862                  | IU6       |           | 22072                   | IU11      | SNP       | 14864                  |
| HU13      | SNP       | 83420                  | DEU15     |           | 20765                   | DEU22     |           | 14845                  |
| HU7       | SNP       | 82231                  | DEU23     |           | 20679                   | HU21      |           | 14826                  |
| HU8       | SNP       | 82125                  | MU1       |           | 20127                   | DEU35     |           | 14607                  |
| DEU29     |           | 81384                  | DEU41     |           | 19862                   | DEU36     |           | 14555                  |
| HU17      | SNP       | 80774                  | MU19      |           | 19774                   | DEU46     |           | 14341                  |
| MU11      | SNP       | 79495                  | IU16      |           | 19587                   | HU14      |           | 13637                  |
| IU10      | SNP       | 72244                  | IU7       |           | 19443                   | MU2       |           | 13452                  |
| DEU20     |           | 62940                  | HU9       |           | 18330                   | DEU47     |           | 13390                  |
| DEU17     |           | 62740                  | DEU19     |           | 17354                   | MU6       |           | 13264                  |
| DEU37     |           | 62085                  | DEU11     |           | 17264                   | IU8       |           | 12317                  |
| DEU9      |           | 60435                  | DEU39     |           | 17119                   | DEU10     |           | 11988                  |
| HU16      |           | 59307                  | MU20      |           | 16907                   | DEU2      |           | 11827                  |
| HU11      |           | 58291                  | DEU16     |           | 16780                   | HU18      |           | 11402                  |
| HU5       |           | 52212                  | DEU28     |           | 16752                   | HU2       |           | 11383                  |
| HU6       |           | 46616                  | IU13      |           | 16622                   | HU15      |           | 11299                  |
| HU4       |           | 40677                  | IU3       | SNP       | 16590                   | MU4       | SNP       | 10580                  |
| DEU42     |           | 34291                  | DEU38     |           | 16316                   | DEU43     |           | 10115                  |
| DEU3      |           | 33352                  | DEU14     |           | 16179                   | MU10      |           | 9426                   |
| DEU40     |           | 33022                  | HU12      |           | 16062                   | HU10      |           | 9426                   |
| DEU1      |           | 31815                  | IU18      |           | 16053                   | MU7       |           | 8989                   |
| DEU27     |           | 28779                  | DEU50     |           | 16017                   | MU5       |           | 8829                   |
| DEU30     |           | 27803                  | MU3       |           | 15943                   | HU23      |           | 7859                   |
| DEU4      |           | 27328                  | IU14      |           | 15893                   | MU9       |           | 7567                   |
| IU1       |           | 27103                  | IU2       | SNP       | 15832                   | HU26      |           | 5049                   |
| DEU7      |           | 25698                  | IU15      |           | 15793                   | HU24      |           | 4693                   |
